# Supplementary material for: Association between PET/CT Scan Findings, Treatment, and Cancer Incidence in a Cohort of AAA Patients
Source: MDPI journal article supplement (doi:10.3390/jcm13061569), 2024-03-09
Supplement: s1 [file s1]

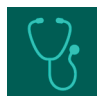

## Supplemental Material

### Supplemental Figures

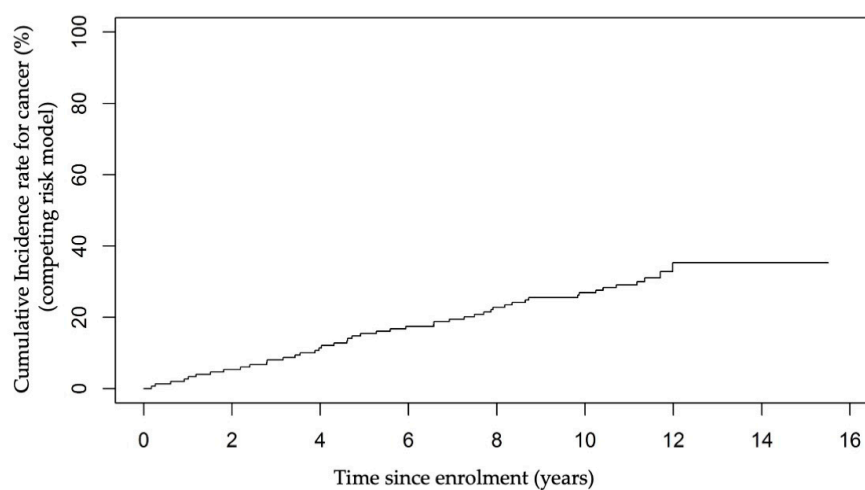

**Supplemental Figure S1.** Cumulative incidence rate for cancer, estimated by competing risk model.

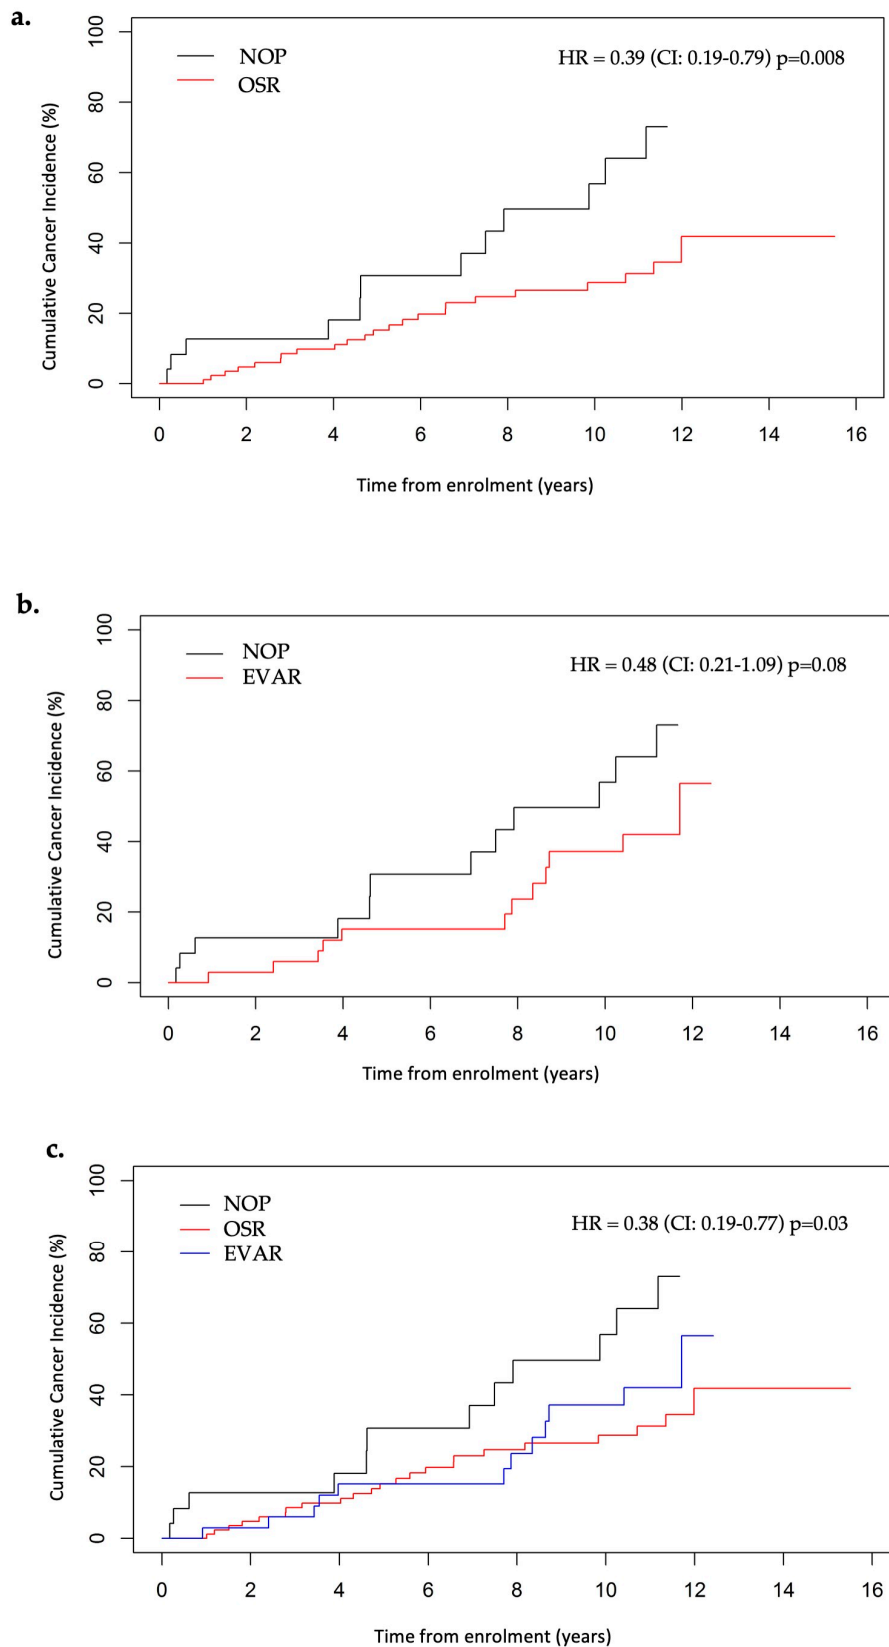

**Supplemental Figure S2.** Cumulative cancer incidence in NOP, OSR and EVAR group of patients. Comparison of two groups, OSR vs NOP **(a)** or EVAR vs NOP **(b)** or three groups OSR vs EVAR vs NOP **(c)**.

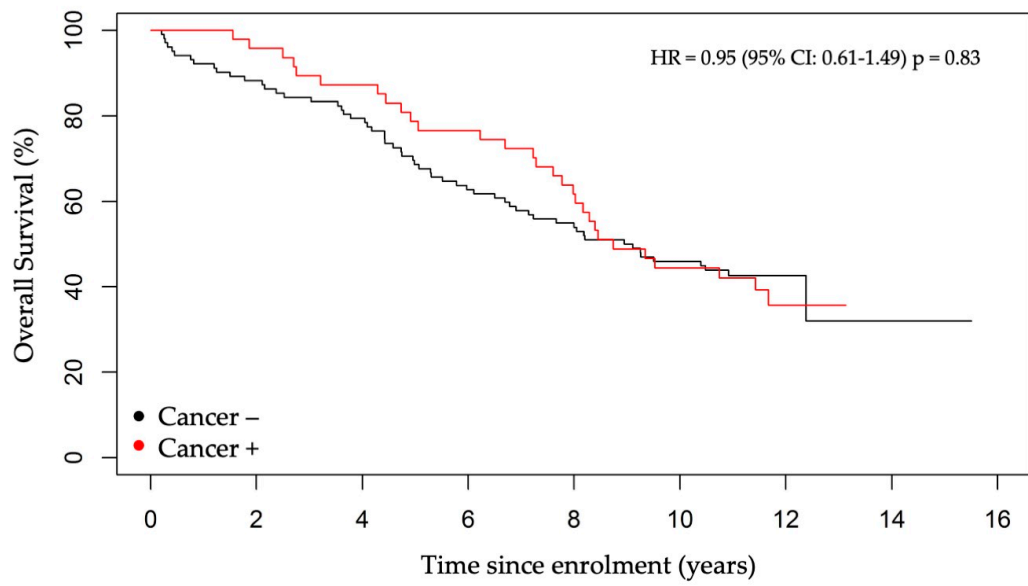

**Supplemental Figure S3.** Overall survival in Cancer - versus Cancer + patients (KM curves).

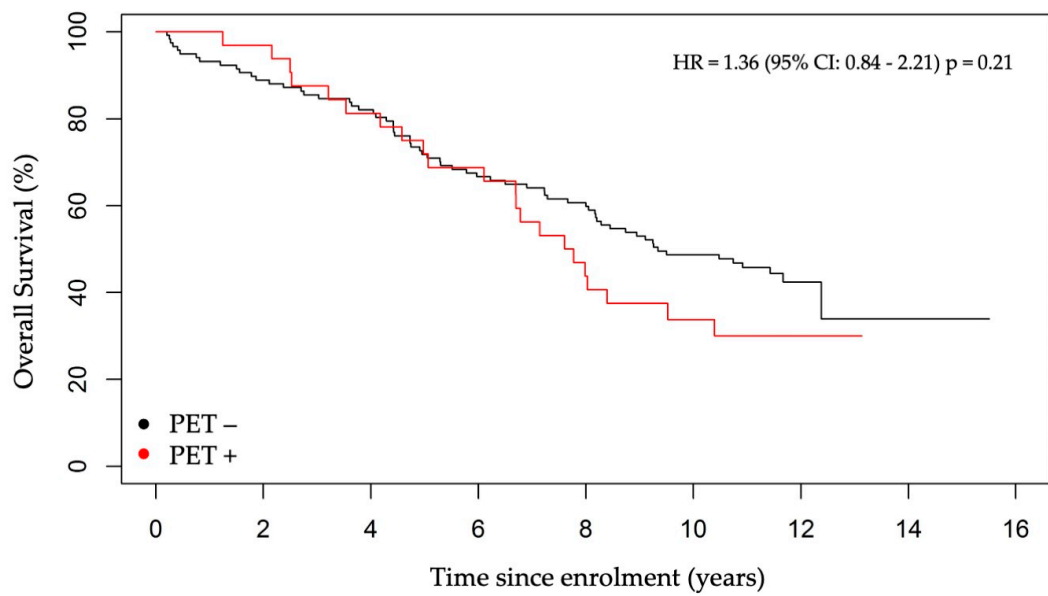

**Supplemental Figure S4.** Overall survival in PET - versus PET + patients (KM curves).

---

## Supplemental Tables

**Supplemental Table S1.** Distribution of the number of PET/CT scans performed per patient.

| Number of PET/CT per patient | Number of patients (%) | Number of scans (%) | Number of patients with SUV <sub>r</sub> ≥1 (%) | Number of patients PET + and Cancer + |
|------------------------------|------------------------|---------------------|-------------------------------------------------|---------------------------------------|
| 1                            | 64 (43.0)              | 64 (22.0)           | 8 (12.5)                                        | 5 (62.5)                              |
| 2                            | 43 (28.9)              | 86 (29.6)           | 7 (16.3)                                        | 4 (57.1)                              |
| 3                            | 29 (19.5)              | 87 (29.9)           | 13 (44.8)                                       | 4 (30.8)                              |
| 4                            | 11 (7.4)               | 44 (15.1)           | 3 (27.3)                                        | 1 (33.3)                              |
| 5                            | 2 (1.3)                | 10 (3.4)            | 1 (50.0)                                        | 1 (100.0)                             |
| Total                        | 149                    | 291 (21.5)          | 32 (21.5)                                       | 15 (46.9)                             |

**Supplemental Table S2.** Distribution of patients according to PET status (positive/negative) and cancer occurrence or PET status and smoking. P-value was calculated by Fisher exact test.

| Variable      | PET +<br>n (%) | PET -<br>n (%) | p-value     |
|---------------|----------------|----------------|-------------|
| Cancer        | 15 (46.8)      | 32 (27.3)      | <u>0.03</u> |
| Smoking       | 26 (81.3)      | 102 (87.2)     | 0.40        |
| Total (n=149) | 32 (21.5)      | 117 (78.5)     |             |

**Supplemental Table S3.** Distribution of patients according to AAA treatment and PET status

| Variable      | NOP n (%) | EVAR n (%) | OSR n (%) | <i>p</i> -value |
|---------------|-----------|------------|-----------|-----------------|
| PET +         | 5 (20.8)  | 6 (17.1)   | 21 (23.3) | 0.75            |
| Total (n=149) | 24 (16.1) | 35 (23.5)  | 90 (60.4) |                 |

**Supplemental Table S4.** Distribution of patients according to AAA treatment, cancer occurrence and PET status

| Variable       | PET + n (%) | PET - n (%) | <i>p</i> -value |
|----------------|-------------|-------------|-----------------|
| Cancer in NOP  | 5/5 (100)   | 7/19 (37)   | 0.04            |
| Cancer in EVAR | 3/6 (50)    | 9/29 (31)   | 0.39            |
| Cancer in OSR  | 7/21 (33)   | 16/69 (23)  | 0.40            |

**Supplemental Table S5.** Distribution of patients according to outcome and cancer occurrence

| Variable      | Dead<br>n (%) | Alive<br>n (%) | <i>p</i> -value |
|---------------|---------------|----------------|-----------------|
| Cancer        | 29 (33.0)     | 18 (29.5)      | 0.72            |
| Total (n=149) | 88 (59.1)     | 61 (40.9)      |                 |

**Supplemental Table S6.** Distribution of causes of death

| Causes of death | Number of Patients<br>(% total n=149; % dead n=88) |
|-----------------|----------------------------------------------------|
| Cancer          | 21 (14.1; 23.9)                                    |
| AAA             | 5 (3.4; 5.7)                                       |
| Cardiac         | 18 (12.1; 20.5)                                    |
| Pulmonary       | 5 (3.4; 5.7)                                       |
| Cerebral        | 5 (3.4; 5.7)                                       |
| Other*          | 22 (14.8; 25.0)                                    |
| Unknown         | 12 (8.1; 13.6)                                     |
| Total           | 88 (59.1)                                          |

\*other causes include: mainly old age, then sepsis, orthopedic surgery complications, renal insufficiency, intestinal occlusion.
